# Supplementary material for: Association of the Estrogen Receptor 1 Polymorphisms rs2046210 and rs9383590 with the Risk, Age at Onset and Prognosis of Breast Cancer
Source: MDPI journal article supplement (doi:10.3390/cells12040515), 2023-02-04
Supplement: s1 [file s1]

**Table S5.** Age-adjusted analyses of the association of rs9383590 with breast cancer risk in patient subpopulations.

| Category                 | Subcategory | TC vs TT         |          | CC+TC vs TT             |              | C vs T                  |              |
|--------------------------|-------------|------------------|----------|-------------------------|--------------|-------------------------|--------------|
|                          |             | OR (95% CI)      | <i>p</i> | OR (95% CI)             | <i>p</i>     | OR (95% CI)             | <i>p</i>     |
| Age *                    | <55         | 1.61 (0.95-2.71) | 0.076    | 1.64 (0.98-2.75)        | 0.060        | 1.62 (0.99-2.64)        | 0.054        |
|                          | ≥55         | 0.65 (0.29-1.44) | 0.297    | 0.69 (0.31-1.51)        | 0.361        | 0.75 (0.36-1.59)        | 0.466        |
| Age **                   | <55         | 1.53 (0.97-2.41) | 0.073    | <b>1.58 (1.01-2.48)</b> | <b>0.048</b> | <b>1.60 (1.04-2.45)</b> | <b>0.034</b> |
|                          | ≥55         | 0.60 (0.28-1.30) | 0.196    | 0.63 (0.30-1.36)        | 0.243        | 0.69 (0.34-1.43)        | 0.322        |
| Menopausal status        | pre         | 1.48 (0.85-2.57) | 0.172    | 1.53 (0.89-2.63)        | 0.135        | 1.54 (0.92-2.59)        | 0.109        |
|                          | post        | 0.98 (0.50-1.93) | 0.949    | 1.08 (0.56-2.10)        | 0.810        | 1.20 (0.64-2.22)        | 0.574        |
| Tumor type               | ductal      | 1.19 (0.72-1.96) | 0.496    | 1.27 (0.78-2.07)        | 0.332        | 1.33 (0.85-2.10)        | 0.216        |
|                          | lobular     | 1.16 (0.54-2.51) | 0.705    | 1.15 (0.53-2.49)        | 0.719        | 1.14 (0.53-2.44)        | 0.737        |
| Tumor size               | pT1         | 1.11 (0.63-1.96) | 0.718    | 1.13 (0.64-1.98)        | 0.671        | 1.14 (0.67-1.96)        | 0.629        |
|                          | pT2-4       | 1.27 (0.71-2.24) | 0.423    | 1.37 (0.79-2.40)        | 0.269        | 1.45 (0.87-2.45)        | 0.162        |
| Stage                    | 0 or I      | 0.79 (0.41-1.52) | 0.472    | 0.82 (0.43-1.56)        | 0.542        | 0.86 (0.47-1.59)        | 0.637        |
|                          | II-IV       | 1.34 (0.78-2.30) | 0.294    | 1.43 (0.84-2.43)        | 0.190        | 1.49 (0.91-2.45)        | 0.120        |
| Grade                    | pG1-2       | 1.22 (0.71-2.10) | 0.467    | 1.21 (0.71-2.07)        | 0.491        | 1.19 (0.70-2.029)       | 0.524        |
|                          | pG3         | 1.29 (0.74-2.25) | 0.376    | 1.42 (0.83-2.44)        | 0.202        | 1.52 (0.93-2.48)        | 0.102        |
| Lymph node status        | pN0         | 1.00 (0.57-1.76) | 0.995    | 1.07 (0.61-1.85)        | 0.820        | 1.13 (0.67-1.89)        | 0.648        |
|                          | pN+         | 1.26 (0.70-2.27) | 0.453    | 1.32 (0.74-2.36)        | 0.353        | 1.37 (0.79-2.37)        | 0.270        |
| ER status                | pos         | 1.38 (0.82-2.34) | 0.229    | 1.39 (0.82-2.34)        | 0.219        | 1.37 (0.83-2.28)        | 0.220        |
|                          | neg         | 1.07 (0.59-1.94) | 0.819    | 1.18 (0.66-2.09)        | 0.578        | 1.28 (0.75-2.17)        | 0.372        |
| PR status                | pos         | 1.12 (0.63-2.01) | 0.698    | 1.11 (0.62-1.99)        | 0.724        | 1.10 (0.62-1.95)        | 0.756        |
|                          | neg         | 1.23 (0.73-2.08) | 0.447    | 1.33 (0.80-2.22)        | 0.278        | 1.40 (0.87-2.25)        | 0.166        |
| HER2 status              | pos         | 1.33 (0.66-2.68) | 0.427    | 1.32 (0.66-2.64)        | 0.445        | 1.29 (0.65-2.56)        | 0.473        |
|                          | neg         | 1.09 (0.66-1.80) | 0.738    | 1.16 (0.71-1.90)        | 0.548        | 1.22 (0.77-1.94)        | 0.388        |
| KI67 status (%pos cells) | >10%        | 1.07 (0.58-2.00) | 0.823    | 1.18 (0.64-2.15)        | 0.601        | 1.27 (0.73-2.21)        | 0.410        |
|                          | ≤10%        | 1.11 (0.63-1.98) | 0.718    | 1.16 (0.65-2.04)        | 0.620        | 1.19 (0.69-2.05)        | 0.525        |
| TP53 status              | pos         | 1.32 (0.72-2.42) | 0.372    | 1.46 (0.81-2.62)        | 0.216        | 1.56 (0.91-2.68)        | 0.115        |
|                          | neg         | 1.24 (0.74-2.09) | 0.409    | 1.25 (0.75-2.08)        | 0.397        | 1.24 (0.76-2.04)        | 0.395        |
| Molecular subtype        | luminal     | 1.33 (0.81-2.21) | 0.266    | 1.33 (0.81-2.20)        | 0.260        | 1.32 (0.81-2.15)        | 0.263        |
|                          | HER2 type   | 1.63 (0.65-4.07) | 0.314    | 1.61 (0.64-4.03)        | 0.324        | 1.57 (0.64-3.86)        | 0.343        |
|                          | triple neg  | 0.84 (0.37-1.89) | 0.662    | 1.04 (0.49-2.21)        | 0.915        | 1.26 (0.65-2.46)        | 0.505        |

Age-adjusted odds ratios in TC vs. TT comparisons, in the dominant model (TC+CC vs. TT), and per-allele odds ratios (C vs. T) for rs9383590 in the indicated clinically and molecularly relevant subcategories of breast cancer are shown. Significant associations are highlighted in bold. OR, odds ratios; 95% CI, 95% confidence intervals; *p*, *p*-values; Numbers and fraction of patients (in %) in the indicated subcategories are provided in Table S4; pre, pre-menopausal; post, post-menopausal; ER, estrogen receptor; PR, progesterone receptor; pos, positive; and neg, negative. \* cases aged <55 or ≥55 years vs. controls aged <55 or ≥55 years; \*\* cases aged <55 or ≥55 years vs. controls of any age (for sake of comparability with the other subcategory analyses).
