# Supplementary material for: Association of the Estrogen Receptor 1 Polymorphisms rs2046210 and rs9383590 with the Risk, Age at Onset and Prognosis of Breast Cancer
Source: MDPI journal article supplement (doi:10.3390/cells12040515), 2023-02-04
Supplement: s1 [file s1]

**Table S4.** Additional analyses of the association of rs9383590 with breast cancer risk in patient subpopulations.

| Category                 | Subcategory | Patients |       | TC vs TT         |          | CC+TC vs TT             |              |
|--------------------------|-------------|----------|-------|------------------|----------|-------------------------|--------------|
|                          |             | No.      | %     | OR (95% CI)      | <i>p</i> | OR (95% CI)             | <i>p</i>     |
| Age *                    | <55         | 173      | 42.4% | 1.59 (1.00-2.54) | 0.056    | <b>1.65 (1.04-2.61)</b> | <b>0.035</b> |
|                          | ≥55         | 235      | 57.6% | 0.69 (0.32-1.51) | 0.338    | 0.74 (0.34-1.60)        | 0.447        |
| Age **                   | <55         | 173      | 42.4% | 1.54 (0.98-2.42) | 0.065    | <b>1.60 (1.02-2.49)</b> | <b>0.042</b> |
|                          | ≥55         | 235      | 57.6% | 0.86 (0.54-1.36) | 0.505    | 0.90 (0.57-1.41)        | 0.634        |
| Menopausal status        | pre         | 101      | 28.7% | 1.48 (0.85-2.57) | 0.171    | 1.53 (0.89-2.63)        | 0.134        |
|                          | post        | 251      | 71.3% | 1.01 (0.65-1.56) | 0.971    | 1.07 (0.70-1.64)        | 0.754        |
| Tumor type               | ductal      | 249      | 75.5% | 1.19 (0.78-1.81) | 0.433    | 1.28 (0.84-1.93)        | 0.251        |
|                          | lobular     | 81       | 24.5% | 1.16 (0.62-2.20) | 0.643    | 1.15 (0.61-2.16)        | 0.677        |
| Tumor size               | pT1         | 175      | 52.2% | 1.02 (0.63-1.67) | 0.927    | 1.04 (0.64-1.70)        | 0.860        |
|                          | pT2-4       | 160      | 47.8% | 1.36 (0.85-2.19) | 0.211    | 1.43 (0.89-2.27)        | 0.142        |
| Stage                    | 0 or I      | 143      | 43.2% | 0.76 (0.43-1.34) | 0.334    | 0.79 (0.45-1.38)        | 0.402        |
|                          | II-IV       | 188      | 56.8% | 1.34 (0.85-2.10) | 0.212    | 1.39 (0.89-2.17)        | 0.151        |
| Grade                    | pG1-2       | 239      | 62.1% | 1.09 (0.70-1.68) | 0.710    | 1.07 (0.69-1.65)        | 0.762        |
|                          | pG3         | 146      | 37.9% | 1.30 (0.79-2.13) | 0.311    | 1.42 (0.88-2.30)        | 0.161        |
| Lymph node status        | pN0         | 196      | 59.6% | 0.90 (0.55-1.47) | 0.673    | 0.95 (0.59-1.53)        | 0.840        |
|                          | pN+         | 133      | 40.4% | 1.38 (0.83-2.29) | 0.220    | 1.46 (0.89-2.40)        | 0.138        |
| ER status                | pos         | 273      | 69.6% | 1.16 (0.77-1.76) | 0.473    | 1.17 (0.78-1.76)        | 0.454        |
|                          | neg         | 119      | 30.4% | 1.08 (0.62-1.89) | 0.788    | 1.18 (0.68-2.02)        | 0.562        |
| PR status                | pos         | 187      | 48.6% | 1.11 (0.69-1.77) | 0.672    | 1.09 (0.68-1.74)        | 0.720        |
|                          | neg         | 198      | 51.4% | 1.13 (0.72-1.80) | 0.592    | 1.22 (0.78-1.91)        | 0.391        |
| HER2 status              | pos         | 74       | 19.9% | 1.19 (0.62-2.29) | 0.612    | 1.17 (0.61-2.25)        | 0.645        |
|                          | neg         | 297      | 80.1% | 1.09 (0.72-1.64) | 0.690    | 1.14 (0.76-1.70)        | 0.532        |
| KI67 status (%pos cells) | >10%        | 125      | 40.6% | 1.02 (0.58-1.78) | 0.951    | 1.11 (0.65-1.90)        | 0.712        |
|                          | ≤10%        | 183      | 59.4% | 1.06 (0.65-1.70) | 0.824    | 1.08 (0.67-1.73)        | 0.764        |
| TP53 status              | pos         | 98       | 25.7% | 1.47 (0.84-2.57) | 0.191    | 1.59 (0.92-2.74)        | 0.104        |
|                          | neg         | 284      | 74.3% | 1.05 (0.69-1.60) | 0.807    | 1.06 (0.70-1.60)        | 0.782        |
| Molecular subtype        | luminal     | 295      | 82.6% | 1.17 (0.78-1.75) | 0.449    | 1.17 (0.79-1.75)        | 0.435        |
|                          | HER2 type   | 33       | 9.2%  | 1.50 (0.62-3.60) | 0.380    | 1.48 (0.61-3.55)        | 0.398        |
|                          | triple neg  | 62       | 17.4% | 0.86 (0.39-1.89) | 0.699    | 1.05 (0.51-2.18)        | 0.886        |

Odds ratios in TC vs. TT comparisons and in the dominant model (CC+TC vs. TT) for rs9383590 in the indicated clinically and molecularly relevant subcategories of breast cancer are shown. Significant associations are highlighted in bold. OR, odds ratios; 95% CI, 95% confidence intervals; *p*, *p*-values; No., number of patients in the indicated subcategories; %, fraction of patients in the indicated subcategories (in %); pre, pre-menopausal; post, post-menopausal; ER, estrogen receptor; PR, progesterone receptor; pos, positive; and neg, negative. \* cases aged <55 or ≥55 years vs. controls aged <55 or ≥55 years; \*\* cases aged <55 or ≥55 years vs. controls of any age (for sake of comparability with the other subcategory analyses).
