# Supplementary material for: Association of the Estrogen Receptor 1 Polymorphisms rs2046210 and rs9383590 with the Risk, Age at Onset and Prognosis of Breast Cancer
Source: MDPI journal article supplement (doi:10.3390/cells12040515), 2023-02-04
Supplement: s1 [file s1]

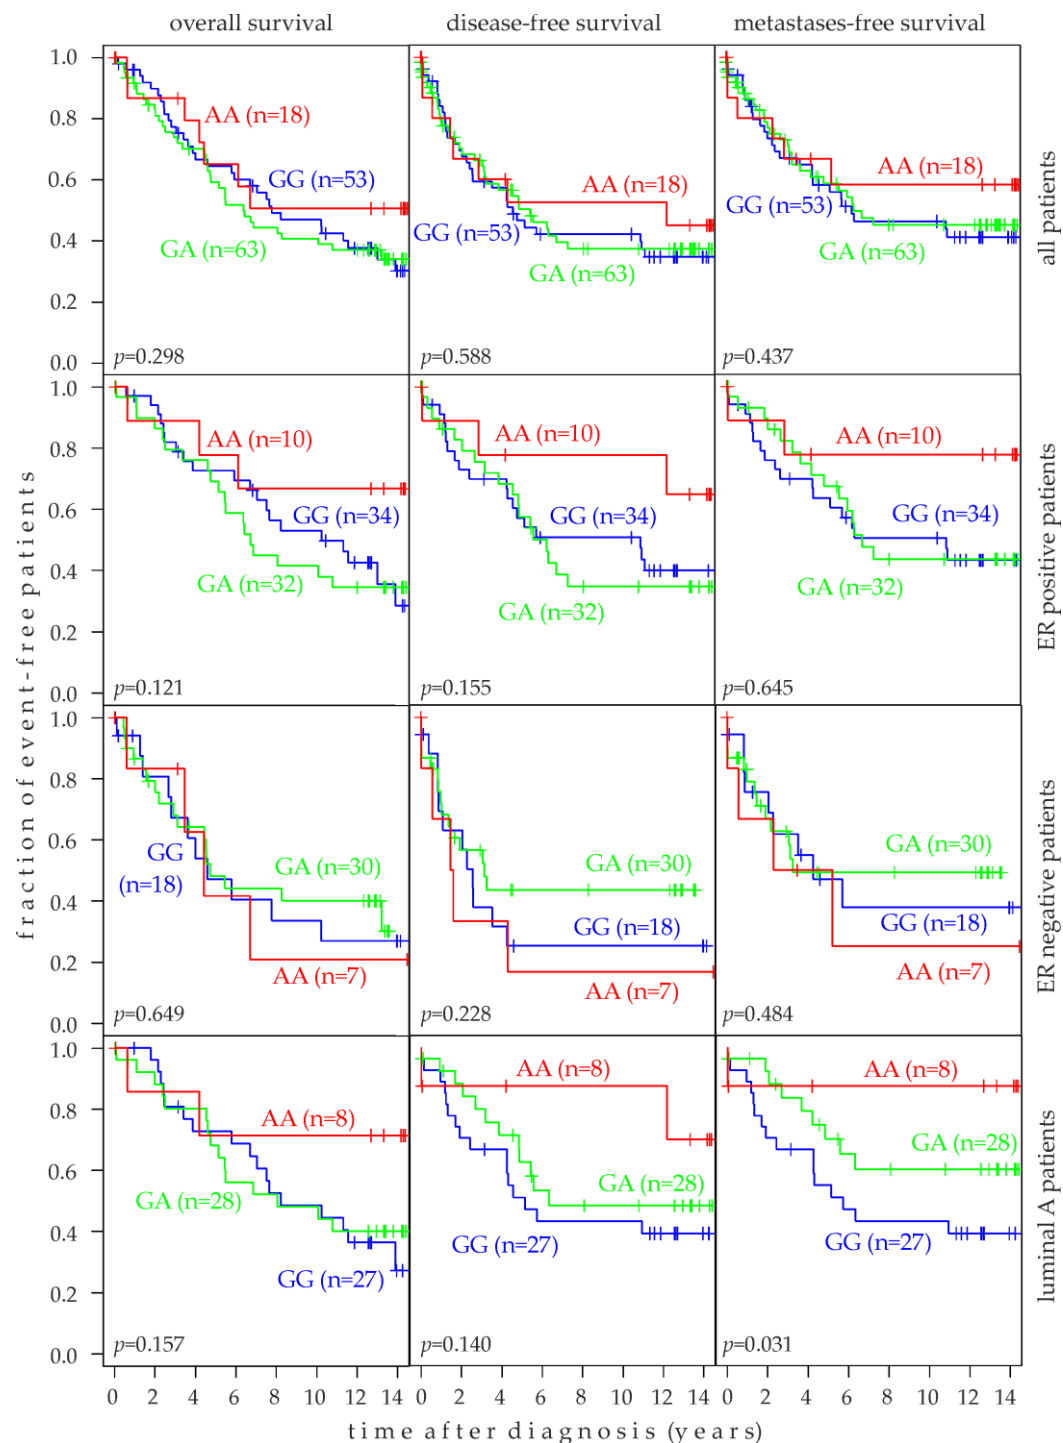

**Figure S3.** Association of rs2046210 genotypes with the survival of human breast cancer patients. Kaplan-Meier analyses of the overall survival, disease-free survival and metastasis-free survival in unselected patients (top row;  $n=134$ ), estrogen receptor (ER) positive patients (second row;  $n=76$ ), ER negative patients (third row;  $n=55$ ), and luminal A patients (bottom row;  $n=63$ ) are shown. Numbers ( $n$ ) of patients in each group and  $p$ -values ( $p$ ) determined by log-rank tests are indicated.
