# Supplementary material for: Association of the Estrogen Receptor 1 Polymorphisms rs2046210 and rs9383590 with the Risk, Age at Onset and Prognosis of Breast Cancer
Source: MDPI journal article supplement (doi:10.3390/cells12040515), 2023-02-04
Supplement: s1 [file s1]

**Table S1.** Clinical characteristics of the study population, and genotype frequencies of rs2046210.

|                              |            | Total | GG          | GA          | AA          |
|------------------------------|------------|-------|-------------|-------------|-------------|
| All subjects                 |            | 831   | 346 (41.6%) | 382 (46.0%) | 103 (12.4%) |
| Patients                     |            | 409   | 159 (38.9%) | 195 (47.7%) | 55 (13.4%)  |
| Controls                     |            | 422   | 187 (44.3%) | 187 (44.3%) | 48 (11.4%)  |
| <b>Patient subgroups</b>     |            |       |             |             |             |
| Age (years)                  | <55        | 173   | 65 (37.6%)  | 82 (47.4%)  | 26 (15.0%)  |
|                              | ≥55        | 236   | 94 (39.8%)  | 113 (47.9%) | 29 (12.3%)  |
| Menopausal status            | pre        | 101   | 36 (35.6%)  | 49 (48.5%)  | 16 (15.8%)  |
|                              | post       | 252   | 99 (39.3%)  | 121 (48.0%) | 32 (12.7%)  |
|                              | na         | 56    | 24 (42.9%)  | 25 (44.6%)  | 7 (12.5%)   |
| Tumor size                   | pT1        | 176   | 73 (41.5%)  | 75 (42.6%)  | 28 (15.9%)  |
|                              | pT2-4      | 160   | 62 (38.8%)  | 79 (49.4%)  | 19 (11.9%)  |
|                              | other, na  | 73    | 24 (32.9%)  | 41 (56.2%)  | 8 (11.0%)   |
| Tumor type                   | ductal     | 250   | 102 (40.8%) | 113 (45.2%) | 35 (14.0%)  |
|                              | lobular    | 81    | 32 (39.5%)  | 39 (48.1%)  | 10 (12.3%)  |
|                              | other, na  | 78    | 25 (32.1%)  | 43 (55.1%)  | 10 (12.8%)  |
| Stage                        | 0-1        | 144   | 60 (41.7%)  | 67 (46.5%)  | 17 (11.8%)  |
|                              | 2-4        | 188   | 73 (38.8%)  | 90 (47.9%)  | 25 (13.3%)  |
|                              | other, na  | 77    | 26 (33.8%)  | 38 (49.4%)  | 13 (16.9%)  |
| Grade                        | pG1-2      | 240   | 93 (38.8%)  | 112 (46.7%) | 35 (14.6%)  |
|                              | pG3        | 146   | 52 (35.6%)  | 78 (53.4%)  | 16 (11.0%)  |
|                              | na         | 23    | 14 (60.9%)  | 5 (21.7%)   | 4 (17.4%)   |
| Lymph node status            | pN0        | 197   | 75 (38.1%)  | 96 (48.7%)  | 26 (13.2%)  |
|                              | pN+        | 133   | 59 (44.4%)  | 56 (42.1%)  | 18 (13.5%)  |
|                              | na         | 68    | 25 (36.8%)  | 43 (63.2%)  | 0 (0.0%)    |
| ER status                    | pos        | 274   | 107 (39.1%) | 128 (46.7%) | 39 (14.2%)  |
|                              | neg        | 119   | 46 (38.7%)  | 60 (50.4%)  | 13 (10.9%)  |
|                              | na         | 16    | 6 (37.5%)   | 7 (43.8%)   | 3 (18.8%)   |
| PR status                    | pos        | 188   | 78 (41.5%)  | 88 (46.8%)  | 22 (11.7%)  |
|                              | neg        | 198   | 71 (35.9%)  | 98 (49.5%)  | 29 (14.6%)  |
|                              | na         | 23    | 10 (43.5%)  | 9 (39.1%)   | 4 (17.4%)   |
| HER2 status                  | pos        | 74    | 28 (37.8%)  | 35 (47.3%)  | 11 (14.9%)  |
|                              | neg        | 298   | 115 (38.6%) | 144 (48.3%) | 39 (13.1%)  |
|                              | na         | 37    | 16 (43.2%)  | 16 (43.2%)  | 5 (13.5%)   |
| TP53 status                  | pos        | 98    | 36 (36.7%)  | 50 (51.0%)  | 12 (12.2%)  |
|                              | neg        | 285   | 109 (38.2%) | 135 (47.4%) | 41 (14.4%)  |
|                              | na         | 26    | 13 (50.0%)  | 10 (38.5%)  | 3 (11.5%)   |
| KI67 status<br>(% pos cells) | ≤10%       | 184   | 69 (37.5%)  | 88 (47.8%)  | 27 (14.7%)  |
|                              | >10%       | 125   | 54 (43.2%)  | 58 (46.4%)  | 13 (10.4%)  |
|                              | na         | 99    | 36 (36.4%)  | 48 (48.5%)  | 15 (15.2%)  |
| Molecular subtype            | luminal A  | 236   | 95 (40.3%)  | 109 (46.2%) | 32 (13.6%)  |
|                              | luminal B  | 41    | 16 (39.0%)  | 19 (46.3%)  | 6 (14.6%)   |
|                              | HER2 type  | 33    | 12 (36.4%)  | 16 (48.5%)  | 5 (15.2%)   |
|                              | triple neg | 62    | 20 (32.3%)  | 35 (56.5%)  | 7 (11.3%)   |
|                              | na         | 37    | 16 (43.2%)  | 16 (43.2%)  | 5 (13.5%)   |

Numbers of patients and controls, as well as number of patients in the indicated subgroups are shown. Parenthesized numbers show the fraction of patients (%) with the indicated genotypes. ER, estrogen receptor; PR, progesterone receptor; na, status not available.
