# Supplementary material for: Association of the Estrogen Receptor 1 Polymorphisms rs2046210 and rs9383590 with the Risk, Age at Onset and Prognosis of Breast Cancer
Source: MDPI journal article supplement (doi:10.3390/cells12040515), 2023-02-04
Supplement: s1 [file s1]

**Table S2.** Clinical characteristics of the study population, and genotype frequencies of rs9383590.

|                              |            | Total | TT  |         | TC  |         | CC |         |
|------------------------------|------------|-------|-----|---------|-----|---------|----|---------|
| All subjects                 |            | 823   | 687 | (83.5%) | 131 | (15.9%) | 5  | (0.6%)  |
| Patients                     |            | 408   | 336 | (82.4%) | 68  | (16.7%) | 4  | (1.0%)  |
| Controls                     |            | 415   | 351 | (84.6%) | 63  | (15.2%) | 1  | (0.2%)  |
| <b>Patient subgroups</b>     |            |       |     |         |     |         |    |         |
| Age (years)                  | <55        | 173   | 134 | (77.5%) | 37  | (21.4%) | 2  | (1.2%)  |
|                              | ≥55        | 235   | 202 | (86.0%) | 31  | (13.2%) | 2  | (0.9%)  |
| Menopausal status            | pre        | 101   | 79  | (78.2%) | 21  | (20.8%) | 1  | (1.0%)  |
|                              | post       | 251   | 210 | (83.7%) | 38  | (15.1%) | 3  | (1.2%)  |
|                              | na         | 56    | 47  | (83.9%) | 9   | (16.1%) | 0  | (0.0%)  |
| Tumor size                   | pT1        | 175   | 147 | (84.0%) | 27  | (15.4%) | 1  | (0.6%)  |
|                              | pT2-4      | 160   | 127 | (79.4%) | 31  | (19.4%) | 2  | (1.3%)  |
|                              | other, na  | 73    | 62  | (84.9%) | 10  | (13.7%) | 1  | (1.4%)  |
| Tumor type                   | ductal     | 249   | 202 | (81.1%) | 43  | (17.3%) | 4  | (1.6%)  |
|                              | lobular    | 81    | 67  | (82.7%) | 14  | (17.3%) | 0  | (0.0%)  |
|                              | other, na  | 78    | 67  | (85.9%) | 11  | (14.1%) | 0  | (0.0%)  |
| Stage                        | 0-1        | 143   | 125 | (87.4%) | 17  | (11.9%) | 1  | (0.7%)  |
|                              | 2-4        | 188   | 150 | (79.8%) | 36  | (19.1%) | 2  | (1.1%)  |
|                              | other, na  | 77    | 61  | (79.2%) | 15  | (19.5%) | 1  | (1.3%)  |
| Grade                        | pG1-2      | 239   | 200 | (83.7%) | 39  | (16.3%) | 0  | (0.0%)  |
|                              | pG3        | 146   | 116 | (79.5%) | 27  | (18.5%) | 3  | (2.1%)  |
|                              | na         | 23    | 20  | (87.0%) | 2   | (8.7%)  | 1  | (4.3%)  |
| Lymph node status            | pN0        | 196   | 167 | (85.2%) | 27  | (13.8%) | 2  | (1.0%)  |
|                              | pN+        | 133   | 105 | (78.9%) | 26  | (19.5%) | 2  | (1.5%)  |
|                              | na         | 79    | 64  | (81.0%) | 15  | (19.0%) | 0  | (0.0%)  |
| ER status                    | pos        | 273   | 225 | (82.4%) | 47  | (17.2%) | 1  | (0.4%)  |
|                              | neg        | 119   | 98  | (82.4%) | 19  | (16.0%) | 2  | (1.7%)  |
|                              | na         | 16    | 13  | (81.3%) | 2   | (12.5%) | 1  | (6.3%)  |
| PR status                    | pos        | 187   | 156 | (83.4%) | 31  | (16.6%) | 0  | (0.0%)  |
|                              | neg        | 198   | 162 | (81.8%) | 33  | (16.7%) | 3  | (1.5%)  |
|                              | na         | 23    | 18  | (78.3%) | 4   | (17.4%) | 1  | (4.3%)  |
| HER2 status                  | pos        | 74    | 61  | (82.4%) | 13  | (17.6%) | 0  | (0.0%)  |
|                              | neg        | 297   | 246 | (82.8%) | 48  | (16.2%) | 3  | (1.0%)  |
|                              | na         | 37    | 29  | (78.4%) | 7   | (18.9%) | 1  | (2.7%)  |
| TP53 status                  | pos        | 98    | 76  | (77.6%) | 20  | (20.4%) | 2  | (2.0%)  |
|                              | neg        | 284   | 238 | (83.8%) | 45  | (15.8%) | 1  | (0.4%)  |
|                              | na         | 26    | 13  | (50.0%) | 10  | (38.5%) | 3  | (11.5%) |
| KI67 status<br>(% pos cells) | ≤10%       | 183   | 153 | (83.6%) | 29  | (15.8%) | 1  | (0.5%)  |
|                              | >10%       | 125   | 104 | (83.2%) | 19  | (15.2%) | 2  | (1.6%)  |
|                              | na         | 99    | 78  | (78.8%) | 20  | (20.2%) | 1  | (1.0%)  |
| Molecular subtype            | luminal A  | 235   | 194 | (82.6%) | 40  | (17.0%) | 1  | (0.4%)  |
|                              | luminal B  | 41    | 35  | (85.4%) | 6   | (14.6%) | 0  | (0.0%)  |
|                              | HER2 type  | 33    | 26  | (78.8%) | 7   | (21.2%) | 0  | (0.0%)  |
|                              | triple neg | 62    | 52  | (83.9%) | 8   | (12.9%) | 2  | (3.2%)  |
|                              | na         | 37    | 29  | (78.4%) | 7   | (18.9%) | 1  | (2.7%)  |

Numbers of patients and controls, as well as number of patients in the indicated subgroups are shown. Parenthesized numbers show the fraction of patients (%) with the indicated genotypes. ER, estrogen receptor; PR, progesterone receptor; na, status not available.
