# Supplementary material for: Association of the Estrogen Receptor 1 Polymorphisms rs2046210 and rs9383590 with the Risk, Age at Onset and Prognosis of Breast Cancer
Source: MDPI journal article supplement (doi:10.3390/cells12040515), 2023-02-04
Supplement: s1 [file s1]

**Table S6.** Univariable analyses of the overall, disease-free and metastasis-free survival using a Cox proportional hazards model.

| Survival type            | Patients  | rs9383590        |          | rs2046210        |          |
|--------------------------|-----------|------------------|----------|------------------|----------|
|                          |           | HR (95% CI)      | <i>p</i> | HR (95% CI)      | <i>p</i> |
| Overall survival         | all       | 0.94 (0.54-1.61) | 0.810    | 0.91 (0.65-1.28) | 0.593    |
|                          | ER pos    | 1.01 (0.47-2.19) | 0.978    | 0.83 (0.54-1.29) | 0.418    |
|                          | ER neg    | 0.78 (0.36-1.69) | 0.536    | 0.98 (0.56-1.72) | 0.943    |
|                          | luminal A | 0.67 (0.26-1.75) | 0.417    | 0.74 (0.44-1.23) | 0.246    |
| Disease-free survival    | all       | 0.90 (0.52-1.58) | 0.724    | 0.92 (0.65-1.29) | 0.621    |
|                          | ER pos    | 0.73 (0.31-1.75) | 0.487    | 0.82 (0.53-1.29) | 0.399    |
|                          | ER neg    | 0.90 (0.43-1.86) | 0.771    | 1.00 (0.57-1.76) | 0.990    |
|                          | luminal A | 0.41 (0.12-1.34) | 0.140    | 0.66 (0.38-1.16) | 0.146    |
| Metastasis-free survival | all       | 0.93 (0.51-1.69) | 0.818    | 0.87 (0.60-1.27) | 0.469    |
|                          | ER pos    | 0.70 (0.27-1.82) | 0.469    | 0.72 (0.44-1.20) | 0.210    |
|                          | ER neg    | 1.03 (0.48-2.22) | 0.931    | 1.09 (0.60-2.00) | 0.770    |
|                          | luminal A | 0.32 (0.08-1.35) | 0.121    | 0.50 (0.26-0.97) | 0.037    |

Analyses of the overall survival, disease-free survival and metastasis-free survival were done in all patients, ER pos patients, ER neg patients, and luminal A patients as indicated. Genotypes were coded as follows: rs9383590, TT=0 (common homozygote genotype), TC=1, CC=2; rs2046210, GG=0 (common homozygote genotype), GA=1, AA=2. HR, hazard ratios; 95% CI, 95% confidence intervals; *p*, *p*-values; ER, estrogen receptor; pos, positive; neg, negative.
