# Supplementary material for: Association of the Estrogen Receptor 1 Polymorphisms rs2046210 and rs9383590 with the Risk, Age at Onset and Prognosis of Breast Cancer
Source: MDPI journal article supplement (doi:10.3390/cells12040515), 2023-02-04
Supplement: s1 [file s1]

**Table S3.** Additional analyses of the association of rs2046210 with breast cancer risk in patient subpopulations.

| Category                 | Subcategory | dominant model          |              | recessive model   |          | AA vs. GG        |          |
|--------------------------|-------------|-------------------------|--------------|-------------------|----------|------------------|----------|
|                          |             | OR (95% CI)             | <i>p</i>     | OR (95% CI)       | <i>p</i> | OR (95% CI)      | <i>p</i> |
| Age *                    | <55         | 1.38 (0.95-2.45)        | 0.087        | 1.44 (0.85-2.45)  | 0.182    | 1.66 (0.94-2.94) | 0.083    |
|                          | ≥55         | 0.91 (0.50-1.65)        | 0.748        | 0.84 (0.36-1.95)  | 0.690    | 0.81 (0.32-2.02) | 0.554    |
| Age **                   | <55         | 1.32 (0.92-1.90)        | 0.129        | 1.38 (0.82-2.30)  | 0.227    | 1.56 (0.90-2.71) | 0.121    |
|                          | ≥55         | 1.20 (0.87-1.66)        | 0.264        | 1.09 (0.67-1.78)  | 0.727    | 1.20 (0.71-2.03) | 0.493    |
| Menopausal status        | pre         | 1.44 (0.92-2.25)        | 0.111        | 1.47 (0.79-2.71)  | 0.232    | 1.73 (0.89-3.38) | 0.115    |
|                          | post        | 1.23 (0.90-1.69)        | 0.201        | 1.13 (0.70-1.839) | 0.608    | 1.26 (0.76-2.10) | 0.377    |
| Tumor type               | ductal      | 1.15 (0.84-1.59)        | 0.374        | 1.27 (0.80-2.02)  | 0.321    | 1.34 (0.81-2.20) | 0.255    |
|                          | lobular     | 1.22 (0.75-1.98)        | 0.423        | 1.10 (0.53-2.27)  | 0.804    | 1.22 (0.56-2.65) | 0.624    |
| Tumor size               | pT1         | 1.12 (0.79-1.60)        | 0.523        | 1.47 (0.89-2.44)  | 0.136    | 1.49 (0.87-2.56) | 0.148    |
|                          | pT2-4       | 1.26 (0.87-1.82)        | 0.225        | 1.05 (0.60-1.859) | 0.866    | 1.19 (0.65-2.18) | 0.568    |
| Stage                    | 0 or I      | 1.11 (0.76-1.63)        | 0.580        | 1.04 (0.58-1.88)  | 0.889    | 1.10 (0.59-2.06) | 0.758    |
|                          | II-IV       | 1.25 (0.88-1.78)        | 0.205        | 1.20 (0.71-2.00)  | 0.503    | 1.33 (0.77-2.32) | 0.312    |
| Grade                    | pG1-2       | 1.26 (0.91-1.74)        | 0.163        | 1.33 (0.83-2.12)  | 0.235    | 1.47 (0.89-2.42) | 0.137    |
|                          | pG3         | 1.44 (0.97-2.12)        | 0.065        | 0.96 (0.53-1.75)  | 0.891    | 1.20 (0.63-2.28) | 0.584    |
| Lymph node status        | pN0         | 1.29 (0.92-1.83)        | 0.142        | 1.18 (0.71-1.97)  | 0.518    | 1.35 (0.78-2.33) | 0.286    |
|                          | pN+         | 1.00 (0.67-1.48)        | 0.992        | 1.22 (0.68-2.18)  | 0.508    | 1.19 (0.64-2.20) | 0.585    |
| ER status                | pos         | 1.24 (0.91-1.69)        | 0.169        | 1.29 (0.82-2.03)  | 0.268    | 1.42 (0.87-2.31) | 0.158    |
|                          | neg         | 1.26 (0.83-1.91)        | 0.269        | 0.96 (0.50-1.83)  | 0.891    | 1.10 (0.55-2.20) | 0.787    |
| PR status                | pos         | 1.12 (0.79-1.59)        | 0.516        | 1.03 (0.60-1.77)  | 0.907    | 1.10 (0.62-1.94) | 0.747    |
|                          | neg         | <b>1.42 (1.00-2.02)</b> | <b>0.045</b> | 1.34 (0.81-2.19)  | 0.255    | 1.59 (0.93-2.72) | 0.093    |
| HER2 status              | pos         | 1.31 (0.79-2.17)        | 0.297        | 1.36 (0.67-2.76)  | 0.405    | 1.53 (0.71-3.29) | 0.287    |
|                          | neg         | 1.27 (0.94-1.71)        | 0.125        | 1.17 (0.75-1.84)  | 0.489    | 1.32 (0.82-2.14) | 0.259    |
| KI67 status (%pos cells) | >10%        | 1.05 (0.70-1.56)        | 0.826        | 0.90 (0.47-1.73)  | 0.759    | 0.94 (0.47-1.86) | 0.854    |
|                          | ≤10%        | 1.33 (0.93-1.89)        | 0.117        | 1.34 (0.81-2.22)  | 0.263    | 1.52 (0.88-2.63) | 0.135    |
| TP53 status              | pos         | 1.30 (0.82-2.06)        | 0.269        | 1.06 (0.53-2.13)  | 0.874    | 1.22 (0.58-2.59) | 0.600    |
|                          | neg         | 1.26 (0.92-1.73)        | 0.148        | 1.29 (0.81-2.04)  | 0.284    | 1.43 (0.87-2.34) | 0.159    |
| Molecular subtype        | luminal     | 1.17 (0.86-1.58)        | 0.314        | 1.22 (0.78-1.91)  | 0.391    | 1.30 (0.81-2.09) | 0.285    |
|                          | HER2 type   | 1.39 (0.67-2.90)        | 0.372        | 1.39 (0.51-3.77)  | 0.530    | 1.62 (0.55-4.83) | 0.398    |
|                          | triple neg  | 1.67 (0.95-2.94)        | 0.070        | 0.99 (0.43-2.30)  | 0.984    | 1.36 (0.54-3.41) | 0.516    |

Odds ratios in the dominant model (GA+AA vs. GG), the recessive model (AA vs. GG+GA), and homozygous comparisons (AA vs. GG) of rs2046210 in the indicated clinically and molecularly relevant subcategories of breast cancer are shown. Significant associations are highlighted in bold. OR, odds ratios; 95% CI, 95% confidence intervals; *p*, *p*-values; Numbers and fraction of patients (in %) in the indicated subcategories are provided in Table 3; pre, pre-menopausal; post, post-menopausal; ER, estrogen receptor; PR, progesterone receptor; pos, positive; and neg, negative. \* cases aged <55 or ≥55 years vs. controls aged <55 or ≥55 years; \*\* cases aged <55 or ≥55 years vs. controls of any age (for sake of comparability with the other subcategory analyses).
